# Supplementary material for: Driving dynamic colloidal assembly using eccentric self-propelled colloids
Source: Royal Society of Chemistry journal article supplement (doi:10.1039/c7sm01730h), 2017-01-01
Supplement: c7sm01730h5.pdf [file c7sm01730h5.pdf]

## Supplementary information for “Driving dynamic colloidal assembly using eccentric self-propelled colloids”

Zhan Ma\*, Qun-li Lei\* and Ran Ni†  
*School of Chemical and Biomedical Engineering,  
Nanyang Technological University, 637459, Singapore*  
\* These authors contributed equally.  
† E-mail: r.ni@ntu.edu.sg

### S1. Simulation Movies for 2D mixture systems

The mov files in the same folder:

Mov\_Fig2a.mov

Mov\_Fig2b.mov

Mov\_Fig2c.mov

Mov\_Fig2d.mov

show how 2D mixture systems composed of passive (red) and active particle (green) with different eccentricity evolve with time. Each file corresponds to the same system as indicated in Fig.2a, b, c, d in the main text respectively.

### S2. Demixing in 3D binary mixture of passive and eccentric active particles

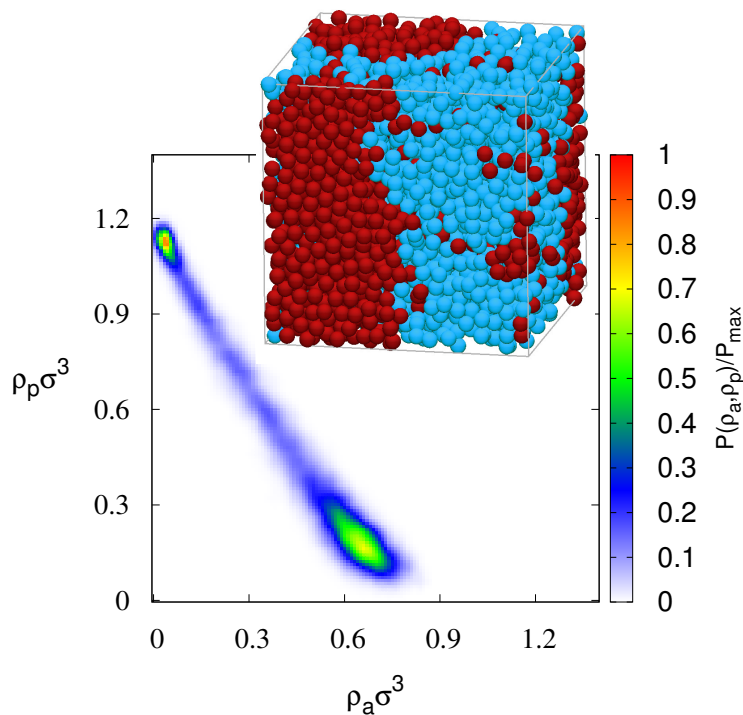

FIG. S1: Reduced probability distribution of local density  $P(\rho_a, \rho_p)/P_{\max}$  with  $P_{\max}$  the maximal value of  $P(\rho_a, \rho_p)$  in the 3D binary mixture of passive and eccentric active Brownian particles with  $\theta=90^\circ$  ( $R=2/3\sigma$ ),  $\rho\sigma^3=0.86$  and  $x_p=0.5$ ,  $f\sigma/k_B T=200$ . The inset shows a typical snapshot of the system, where red and spheres are the passive and eccentric active Brownian particles, respectively.
